# Supplementary material for: Proteomic profiling of endometrioid endometrial cancer reveals differential expression of hormone receptors and MAPK signaling proteins in obese versus non-obese patients
Source: PubMed Central journal article supplement (PMC5739790; doi:10.18632/oncotarget.22203), 2017-10-31
Supplement: oncotarget-08-106989-s001.pdf [file oncotarget-08-106989-s001.pdf]

## **Proteomic profiling of endometrioid endometrial cancer reveals differential expression of hormone receptors and MAPK signaling proteins in obese versus non-obese patients**

### **SUPPLEMENTARY MATERIALS**

**A. Overview of 163 proteins and phospho-proteins employed in the RPPA-assay overlapping between the three data sets used in this study, with antibody information**

See Supplementary File 1

**B. Overview of proteins and phospho-proteins used for calculation of pathway activation scores (Akbari *et al*, Nature Commun, 2014). Pathway members colored to aid visualisation**

See Supplementary File 1

MDACC test cohort

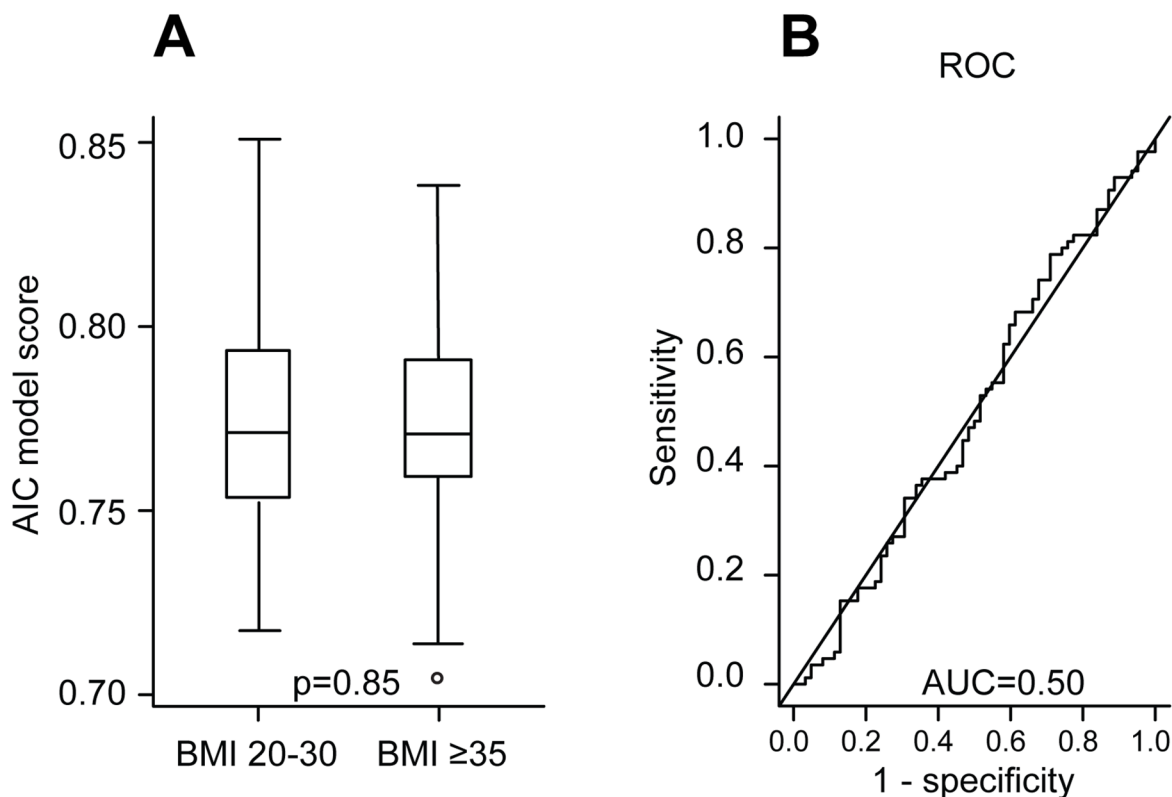

**Supplementary Figure 1: Distribution of model score from 5 proteins in MDACC data set according to BMI groups as defined in Figure 1. (A) No difference in AIC model score distribution according to BMI groups. (B) ROC-curve for prediction models in MDACC test set.**

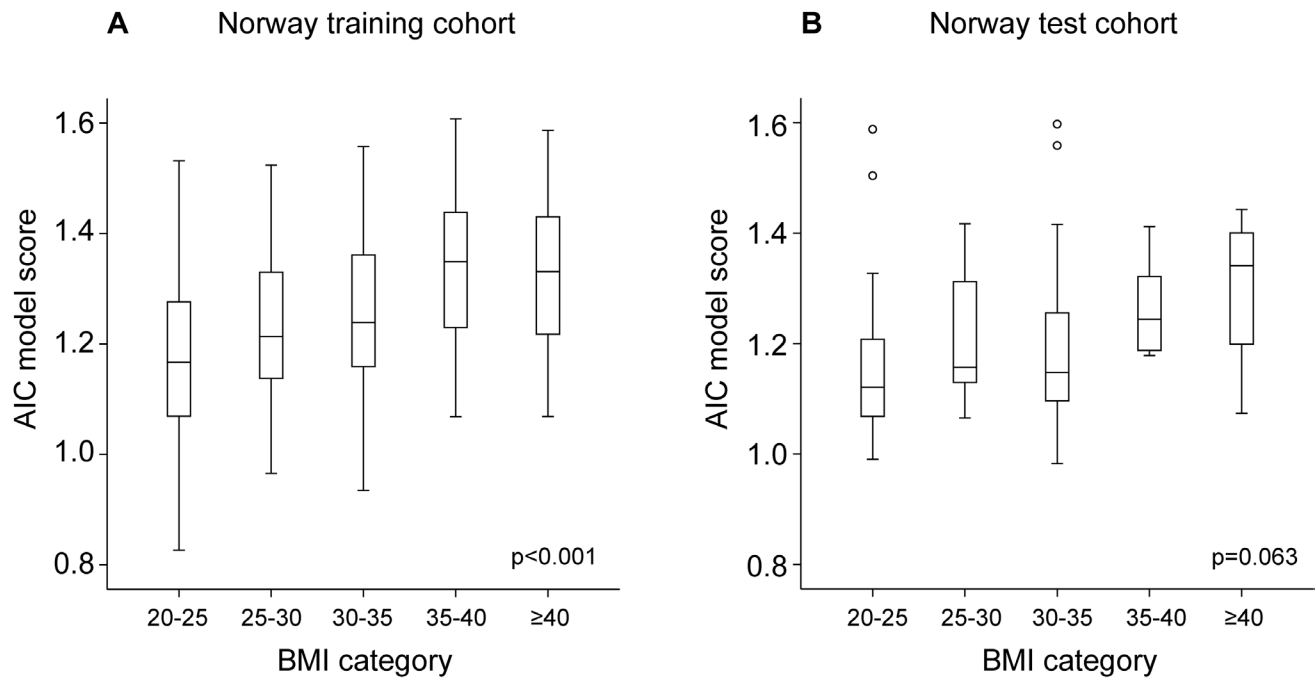

**Supplementary Figure 2: Display of AIC-derived model score in BMI classes as defined by the WHO criteria.** Distribution of BMI associated protein signature in WHO BMI categories for (A). Norway training set and (B). Norway test set. P-value: Kruskal-Wallis test.

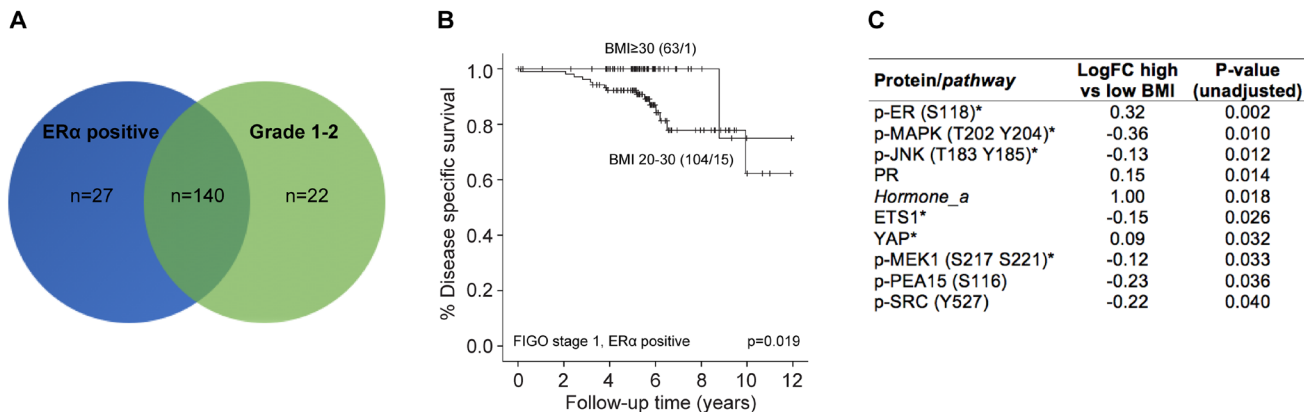

**Supplementary Figure 3: Patients with FIGO stage 1, ER $\alpha$  positive tumors have similar survival and protein expression pattern as patients with FIGO stage 1, grade 1-2 tumors according to BMI groups. (A)** Venn diagram showing overlap between patients with FIGO stage 1, grade 1-2 tumors and FIGO stage 1, ER $\alpha$  positive tumors (assessed by immunohistochemistry). **(B)** Similar pattern of disease specific survival for obese versus non-obese patients with FIGO stage 1, ER $\alpha$  positive tumors (compare to Figure 2B). **(C)** Differentially expressed proteins by LIMMA in tumors from obese versus non-obese patients. \* indicates the same protein was differentially expressed in FIGO stage 1, grade 1-2 tumors (compare to Supplementary Table 2). Abbreviations: LogFC: Log<sub>2</sub> fold change.

Supplementary Table 1: Comparison between Norwegian training cohort and MDACC validation cohort

|                          | Norway training cohort<br>(n=272)<br>2001 – 2013 | MDACC test cohort<br>(n=178)<br>2001 – 2009 | p-value <sup>1</sup> |
|--------------------------|--------------------------------------------------|---------------------------------------------|----------------------|
|                          | n (%)                                            | n (%)                                       |                      |
| <b>FIGO stage</b>        |                                                  |                                             | 0.02                 |
| I                        | 204 (75)                                         | 110 (62)                                    |                      |
| II                       | 24 (9)                                           | 25 (14)                                     |                      |
| III                      | 34 (13)                                          | 29 (16)                                     |                      |
| IV                       | 10 (4)                                           | 13 (7)                                      |                      |
| <b>Grade<sup>2</sup></b> |                                                  |                                             | 0.03                 |
| Grade 1-2                | 203 (76)                                         | 145 (84)                                    |                      |
| Grade 3                  | 65 (24)                                          | 27 (16)                                     |                      |
| <b>Age (mean, SD)</b>    | 65.2 (11.5)                                      | 60.5 (12.9)                                 | <0.001               |
| <b>BMI (mean, SD)</b>    | 29.4 (6.9)                                       | 36.3 (11.2)                                 | <0.001               |
| <b>BMI groups</b>        |                                                  |                                             | <0.001               |
| 20-25                    | 84 (31)                                          | 21 (12)                                     |                      |
| 25-30                    | 84 (31)                                          | 41 (23)                                     |                      |
| 30-35                    | 55 (20)                                          | 30 (17)                                     |                      |
| 35-40                    | 27 (10)                                          | 25 (14)                                     |                      |
| ≥40                      | 22 (8)                                           | 61 (34)                                     |                      |

Abbreviations: BMI: Body mass index; FIGO: International Federation of Gynecology and Obstetrics; MDACC: M.D. Anderson Cancer Center; SD: Standard deviation. n=number of patients.

<sup>1</sup> Pearson Chi-square test for categorical variables, t-test for continuous variables.

<sup>2</sup> Grade missing for 4 tumors in Norway training cohort, 6 tumors in MDACC test cohort.

**Supplementary Table 2: Differentially expressed proteins and pathways in tumors from obese (BMI $\geq$ 30) versus non-obese (BMI20-30) patients with FIGO stage 1, grade 1-2 disease (training set, n=162)**

| <b>Protein/pathway</b> | <b>Log2 Fold change</b> | <b>p-value (unadjusted)</b> |
|------------------------|-------------------------|-----------------------------|
| p-MAPK (T202 Y204)     | -0.40                   | 0.004                       |
| p-ER $\alpha$ (S118)   | 0.29                    | 0.007                       |
| p-JNK (T183 Y185)      | -0.13                   | 0.008                       |
| YAP                    | 0.10                    | 0.013                       |
| p-MEK1 (S217 S221)     | -0.13                   | 0.025                       |
| P38                    | -0.20                   | 0.034                       |
| <i>RTK</i>             | -0.67                   | 0.042                       |
| ETS1                   | -0.14                   | 0.050                       |

Abbreviations: BMI: Body mass index; FIGO: International Federation of Gynecology and Obstetrics. p- indicates phospho-protein (site of phosphorylation in parenthesis).

**Supplementary Table 3: Gene set enrichment analysis (GSEA) comparing FIGO stage 1, grade 1-2 tumors arising in obese (BMI $\geq$ 30, n=43) versus non-obese (BMI 20-30, n=67) patients using Hallmark and c5 (curated) gene sets**

| Rank                      | Gene set                                                                       | Size | p-value | FDR (%) |
|---------------------------|--------------------------------------------------------------------------------|------|---------|---------|
| <i>Hallmark gene sets</i> |                                                                                |      |         |         |
| 1                         | HALLMARK_MYC_TARGETS_V2                                                        | 50   | 0.0     | 0.0     |
| 2                         | HALLMARK_MYC_TARGETS_V1                                                        | 178  | 0.0     | 0.0     |
| 3                         | HALLMARK_TNFA_SIGNALING_VIA_NFKB                                               | 188  | 0.0     | 0.0     |
| 5                         | HALLMARK_ESTROGEN_RESPONSE_EARLY                                               | 186  | 0.0     | 0.04    |
| 6                         | HALLMARK_INTERFERON_GAMMA_RESPONSE                                             | 189  | 0.0     | 0.03    |
| 8                         | HALLMARK_HYPOXIA                                                               | 189  | 0.0     | 0.08    |
| 9                         | HALLMARK_ALLOGRAFT_REJECTION                                                   | 193  | 0.0     | 0.07    |
| 10                        | HALLMARK_INTERFERON_ALPHA_RESPONSE                                             | 90   | 0.0     | 0.08    |
| 11                        | HALLMARK_INFLAMMATORY_RESPONSE                                                 | 194  | 0.0     | 0.46    |
| 14                        | HALLMARK_IL6_JAK_STAT3_SIGNALING                                               | 86   | 0.01    | 0.72    |
| 15                        | HALLMARK_ESTROGEN_RESPONSE_LATE                                                | 196  | 0.0     | 0.83    |
| <i>Curated gene sets</i>  |                                                                                |      |         |         |
| 1                         | SCHUHMACHER_MYC_TARGETS_UP                                                     | 75   | 0.0     | 0.0     |
| 3                         | WINTER_HYPOXIA_UP                                                              | 81   | 0.0     | 0.0     |
| 4                         | SANA_TNF_SIGNALING_UP                                                          | 78   | 0.0     | 0.0     |
| 5                         | HINATA_NFKB_TARGETS_FIBROBLAST_UP                                              | 83   | 0.0     | 0.0     |
| 6                         | MANALO_HYPOXIA_DN                                                              | 256  | 0.0     | 0.0     |
| 7                         | DUTERTRE ESTRADIOL_RESPONSE_6HR_UP                                             | 210  | 0.0     | 0.0     |
| 11                        | SCHLOSSER_MYC_TARGETS_AND_SERUM_RESPONSE_DN                                    | 46   | 0.0     | 0.07    |
| 12                        | SCHLOSSER_MYC_TARGETS_AND_SERUM_RESPONSE_UP                                    | 45   | 0.0     | 0.06    |
| 13                        | JAIN_NFKB_SIGNALING                                                            | 70   | 0.0     | 0.07    |
| 17                        | THEILGAARD_NEUTROPHIL_AT_SKIN_WOUND_UP                                         | 73   | 0.0     | 0.11    |
| 18                        | KARLSSON_TGFB1_TARGETS_UP                                                      | 111  | 0.0     | 0.11    |
| 20                        | PID_MYC_ACTIV_PATHWAY                                                          | 76   | 0.0     | 0.15    |
| 23                        | MENSE_HYPOXIA_UP                                                               | 79   | 0.0     | 0.15    |
| 26                        | PHONG_TNF_TARGETS_UP                                                           | 61   | 0.0     | 0.19    |
| 27                        | WINTER_HYPOXIA_METAGENE                                                        | 227  | 0.0     | 0.2     |
| 28                        | DANG_REGULATED_BY_MYC_UP                                                       | 66   | 0.0     | 0.29    |
| 30                        | MASSARWEH_RESPONSE_TO ESTRADIOL                                                | 54   | 0.0     | 0.3     |
| 31                        | HINATA_NFKB_TARGETS_KERATINOCYTE_UP                                            | 91   | 0.0     | 0.3     |
| 34                        | GALINDO_IMMUNE_RESPONSE_TO_ENTEROTOXIN                                         | 80   | 0.0     | 0.38    |
| 37                        | REACTOME_TAK1_ACTIVATES_NFKB_BY_PHOSPHORYLATION_AND_ACTIVATION_OF_IKKS_COMPLEX | 20   | 0.0     | 0.48    |
| 40                        | BILD_MYC_ONCOGENIC_SIGNATURE                                                   | 170  | 0.0     | 0.64    |
| 41                        | DER_IFN_BETA_RESPONSE_UP                                                       | 96   | 0.0     | 0.64    |
| 42                        | GROSS_HYPOXIA_VIA_HIF1A_UP                                                     | 68   | 0.0     | 0.67    |
| 43                        | ZHANG_RESPONSE_TO_IKK_INHIBITOR_AND_TNF_UP                                     | 199  | 0.0     | 0.65    |
| 47                        | WACKER_HYPOXIA_TARGETS_OF_VHL                                                  | 13   | 0.0     | 0.85    |
| 49                        | SEKI_INFLAMMATORY_RESPONSE_LPS_UP                                              | 74   | 0.0     | 0.88    |
| 50                        | DUTERTRE ESTRADIOL_RESPONSE_24HR_UP                                            | 294  | 0.0     | 0.88    |
| 52                        | COLLER_MYC_TARGETS_UP                                                          | 23   | 0.0     | 0.93    |
| 53                        | MENSSEN_MYC_TARGETS                                                            | 49   | 0.0     | 0.93    |
| 54                        | SCHLOSSER_MYC_TARGETS_REPRESSED_BY_SERUM                                       | 140  | 0.0     | 0.96    |

Selected gene sets enriched in obese patients with FDR < 1% are displayed.

Abbreviations: BMI: Body mass index; FDR: False discovery rate; FIGO: International Federation of Gynecology and Obstetrics. n=number of patients. Size indicates number of genes in reference gene set (available at [www.msigdb.org](http://www.msigdb.org)).

Colors indicate category of the gene set: green: Myc-related gene set; yellow: inflammation/immune activation related gene set; red: estrogen related gene set; blue: hypoxia related gene set.

**Supplementary Table 4: Top ranked proteins/pathways differentially expressed between high and low PI3K score in non-obese patients with FIGO stage 1, ER $\alpha$  positive tumors (immunohistochemistry)**

| <b>A. Norway training cohort (n=104)</b> |                                                      |                             |
|------------------------------------------|------------------------------------------------------|-----------------------------|
| <b>Protein/pathway</b>                   | <b>Log2 fold change (high versus low PI3K score)</b> | <b>FDR adjusted p-value</b> |
| <i>PI3K_AKT</i>                          | 5.8                                                  | 4.10e-26                    |
| p-AKT (S473)                             | 1.9                                                  | 1.14e-19                    |
| p-AKT (T308)                             | 1.6                                                  | 1.62e-19                    |
| p-GSK3AB(S21 S9)                         | 1.1                                                  | 1.15e-17                    |
| p-P38 (T180 Y182)                        | 1.0                                                  | 9.11e-12                    |
| p-SRC (Y527)                             | 0.8                                                  | 3.85e-10                    |
| p-RB (S807 S811)                         | 0.8                                                  | 1.84e-09                    |
| <i>TSC_mTOR</i>                          | 2.6                                                  | 2.21e-09                    |
| G6PD                                     | -0.6                                                 | 2.86e-08                    |
| <i>RAS_MAPK</i>                          | 4.5                                                  | 7.76e-08                    |
| p-PKCPANBII (S660)                       | 0.5                                                  | 2.00e-07                    |
| p-NDRG1 (T346)                           | 0.7                                                  | 3.91e-06                    |
| p-NFKBP65 (S536)                         | 0.7                                                  | 7.39e-06                    |
| p-MAPK (T202 Y204)                       | 0.7                                                  | 1.35e-05                    |
| <i>Hormone_b</i>                         | -1.5                                                 | 4.78e-05                    |
| <i>Apoptosis</i>                         | -2.1                                                 | 7.12e-05                    |
| PDCD4                                    | 0.6                                                  | 0.0002                      |
| CASPASE7CLEAVED (D198)                   | -0.8                                                 | 0.0004                      |
| <b>B. Norway test cohort (n=20)</b>      |                                                      |                             |
| <b>Protein/pathway</b>                   | <b>Log2 fold change (high versus low PI3K score)</b> | <b>p-value (unadjusted)</b> |
| <i>PI3K_AKT</i>                          | 4.4                                                  | 4.32e-07                    |
| p-AKT (T308)                             | 0.6                                                  | 0.0025                      |
| <i>Hormone_b</i>                         | -1.4                                                 | 0.0091                      |
| MEK1                                     | -0.8                                                 | 0.0133                      |
| PDCD4                                    | 0.6                                                  | 0.0261                      |
| p-AKT (S473)                             | 0.7                                                  | 0.0481                      |

Proteins/pathways with fold change  $\pm 0.5$  or larger are displayed.

Abbreviations: ER $\alpha$ : Estrogen receptor alpha; FDR: False discovery rate; FIGO: International Federation of Gynecology and Obstetrics; PI3K: Phosphatidylinositide 3-kinase. p- indicates phospho-protein (site of phosphorylation in parenthesis).
